# Supplementary material for: Vascular Responses following Light Therapy: A Pilot Study with Healthy Volunteers
Source: MDPI journal article supplement (doi:10.3390/jcm12062229), 2023-03-13
Supplement: s1 [file s1]

## Supplementary Materials

**Table S1.** Overview of the cardiovascular parameters. Displayed as mean ( $\pm$  SD) of the first 6 epochs—the last 30 s of baseline (T0) and the first 2.5 min of the light therapy (T1–T5), of all participants, pooled together ( $n = 30$ ). HR (heart rate), SBP (systolic blood pressure), DBP (diastolic blood pressure), MAP (mean arterial pressure), SV (stroke volume), CO (cardiac output), TPR (total peripheral resistance).

| Cardiovascular Parameters          | Intervention | First 6 Epochs—The Last 30 s (Mean $\pm$ SD) |            |            |            |            |            | <i>p</i> -Value |
|------------------------------------|--------------|----------------------------------------------|------------|------------|------------|------------|------------|-----------------|
|                                    |              | T0                                           | T1         | T2         | T3         | T4         | T5         |                 |
| HR                                 | MLT          | 68 (11)                                      | 63 (9)     | 64 (9)     | 63 (9)     | 63 (9)     | 64 (10)    | 0.044           |
| (bpm)                              | Placebo      | 66 (10)                                      | 63 (11)    | 63 (12)    | 62 (10)    | 63 (10)    | 63 (11)    |                 |
| SBP                                | MLT          | 118 (15)                                     | 113 (21)   | 114 (20)   | 116 (19)   | 116 (19)   | 116 (19)   | 0.32            |
| (mmHG)                             | Placebo      | 120 (19)                                     | 116 (23)   | 112 (17)   | 112 (16)   | 112 (16)   | 113 (16)   |                 |
| DBP                                | MLT          | 73 (14)                                      | 68 (17)    | 69 (18)    | 70 (17)    | 70 (17)    | 69 (17)    | 0.671           |
| (mmHG)                             | Placebo      | 75 (14)                                      | 71 (15)    | 69 (15)    | 69 (14)    | 69 (14)    | 70 (14)    |                 |
| MAP                                | MLT          | 91 (14)                                      | 86 (18)    | 87 (18)    | 89 (16)    | 89 (16)    | 88 (16)    | 0.743           |
| (mmHG)                             | Placebo      | 92 (15)                                      | 89 (18)    | 86 (15)    | 86 (15)    | 87 (14)    | 87 (14)    |                 |
| SV                                 | MLT          | 89 (26)                                      | 92 (28)    | 90 (28)    | 90 (28)    | 90 (27)    | 90 (26)    | 0.329           |
| (ml)                               | Placebo      | 90 (28)                                      | 92 (29)    | 92 (31)    | 93 (32)    | 91 (30)    | 92 (30)    |                 |
| CO                                 | MLT          | 6 (2)                                        | 6 (2)      | 6 (2)      | 6 (2)      | 6 (2)      | 6 (2)      | 0.88            |
| (l/min)                            | Placebo      | 6 (2)                                        | 6 (2)      | 6 (2)      | 6 (2)      | 6 (2)      | 6 (2)      |                 |
| TPR                                | MLT          | 1293 (454)                                   | 1304 (569) | 1318 (585) | 1378 (610) | 1353 (607) | 1328 (526) | 0.388           |
| (dyne $\times$ s/cm <sup>5</sup> ) | Placebo      | 1347 (532)                                   | 1384 (647) | 1334 (574) | 1333 (576) | 1357 (605) | 1342 (594) |                 |

**Table S2.** The 24 h HRV parameters of two interventions (MLT or placebo light) of the study group. Displayed as means ( $\pm$  SD), z-score and *p*-value. NN50 count (number of pairs of adjacent NN intervals differing by more than 50 ms in the entire recording), pNN50 (NN50 count divided by the total number of all NN intervals), SDNN (standard deviation of all NN intervals), RMSSD (the square root of the mean of the sum of the squares of differences between adjacent NN intervals), SDSD (standard deviation of differences between adjacent NN intervals), SDANN (standard deviation of the averages of NN intervals in all 5 min segments of the entire recording), SDNN index: (mean of the standard deviations of all NN intervals for all 5 min segments of the entire recording).

| Parameters                | Intervention | Mean (SD)      | Z      | <i>p</i> -Value |
|---------------------------|--------------|----------------|--------|-----------------|
| NN50 count (total number) | MLT          | 8208 (6718)    | -0.751 | 0.452           |
|                           | Placebo      | 7438 (7311)    |        |                 |
| pNN50 (%)                 | MLT          | 14.87 (12.60)  | -0.956 | 0.339           |
|                           | Placebo      | 12.56 (11.33)  |        |                 |
| SDNN (ms)                 | MLT          | 220.37 (71.66) | -0.934 | 0.350           |
|                           | Placebo      | 206.5 (68.60)  |        |                 |
| RMSSD (ms)                | MLT          | 186.5 (122.14) | -0.114 | 0.909           |
|                           | Placebo      | 166.4 (104.94) |        |                 |
| SDSD (ms)                 | MLT          | 186.5 (122.14) | -0.114 | 0.909           |
|                           | Placebo      | 166.4 (104.94) |        |                 |
| SDANN (ms)                | MLT          | 139.91 (50.26) | -0.296 | 0.767           |
|                           | Placebo      | 140.73 (50.13) |        |                 |
| SDNN index (ms)           | MLT          | 143.38 (83.10) | -0.296 | 0.767           |
|                           | Placebo      | 127.14 (64.64) |        |                 |

**Table S3.** An overview of the 24 h blood pressure parameters (mean  $\pm$  SD) of all participants, as well as the results of the paired t-test. It shows the parameters as means  $\pm$  standard deviation and the results from the paired t-tests, presented as the T-score, the degrees of freedom, and the *p*-value. HR (heart rate), SPB (systolic blood pressure), DPB (diastolic blood pressure), MESOR (midline estimating statistic of rhythm).

| 24 h Blood Pressure Parameters | Intervention | Mean (SD) | T     | df | <i>p</i> -Value |
|--------------------------------|--------------|-----------|-------|----|-----------------|
| MESOR SBP (mmHg)               | MLT          | 131 (14)  | 0.797 | 26 | 0.433           |
|                                | Placebo      | 130 (11)  |       |    |                 |
| Mean SBP (mmHg)                | MLT          | 133 (15)  | 0.911 | 26 | 0.371           |
|                                | Placebo      | 132 (10)  |       |    |                 |
| MESOR DBP (mmHg)               | MLT          | 77 (7)    | -0.09 | 26 | 0.931           |
|                                | Placebo      | 78 (6)    |       |    |                 |
| Mean DBP (mmHg)                | MLT          | 79 (7)    | 0.351 | 26 | 0.728           |
|                                | Placebo      | 79 (6)    |       |    |                 |
| MESOR HR (bpm)                 | MLT          | 70 (7)    | -0.49 | 26 | 0.628           |
|                                | Placebo      | 71 (8)    |       |    |                 |
| Mean HR (bpm)                  | MLT          | 72 (7)    | 0.101 | 26 | 0.921           |
|                                | Placebo      | 72 (8)    |       |    |                 |

**Table S4.** Within-subject effects for the total cohort of participants without between-subject effects or covariates. CRAE (central retinal artery equivalent), CRVE (central retinal vein equivalent), AVR (artery-to-vein ratio).

| Parameter | Effect                                                                     |                                                                       |                                                                        |
|-----------|----------------------------------------------------------------------------|-----------------------------------------------------------------------|------------------------------------------------------------------------|
|           | MLT-Placebo                                                                | Before-After                                                          | MLT-Placebo x Before-After                                             |
| CRAE      | $F(1,24) = 0.710, p = 0.408, \varepsilon = 1,$<br>partial $\eta^2 = 0.029$ | $F(1,24) = 0.550, p = 0.465, \varepsilon = 1,$<br>p. $\eta^2 = 0.022$ | $F(1,24) = 17.004, p = 0.000, \varepsilon = 1,$<br>p. $\eta^2 = 0.415$ |
| CRVE      | $F(1,24) = 0.020, p = 0.889, \varepsilon = 1,$<br>partial $\eta^2 = 0.001$ | $F(1,24) = 0.913, p = 0.349, \varepsilon = 1,$<br>p. $\eta^2 = 0.037$ | $F(1,24) = 11.999, p = 0.002, \varepsilon = 1,$<br>p. $\eta^2 = 0.333$ |
| AVR       | $F(1,24) = 0.947, p = 0.340, \varepsilon = 1,$<br>partial $\eta^2 = 0.038$ | $F(1,24) = 0.017, p = 0.896, \varepsilon = 1,$<br>p. $\eta^2 = 0.001$ | $F(1,24) = 0.069, p = 0.796, \varepsilon = 1, p.$<br>$\eta^2 = 0.003$  |
